# Supplementary material for: Analysis of Non-Structural Carbohydrates and Xylem Anatomy of Leaf Petioles Offers New Insights in the Drought Response of Two Grapevine Cultivars
Source: PubMed Central journal article supplement (PMC7073087; doi:10.3390/ijms21041457), 2020-02-20
Supplement: ijms-21-01457-s001.pdf [file ijms-21-01457-s001.pdf]

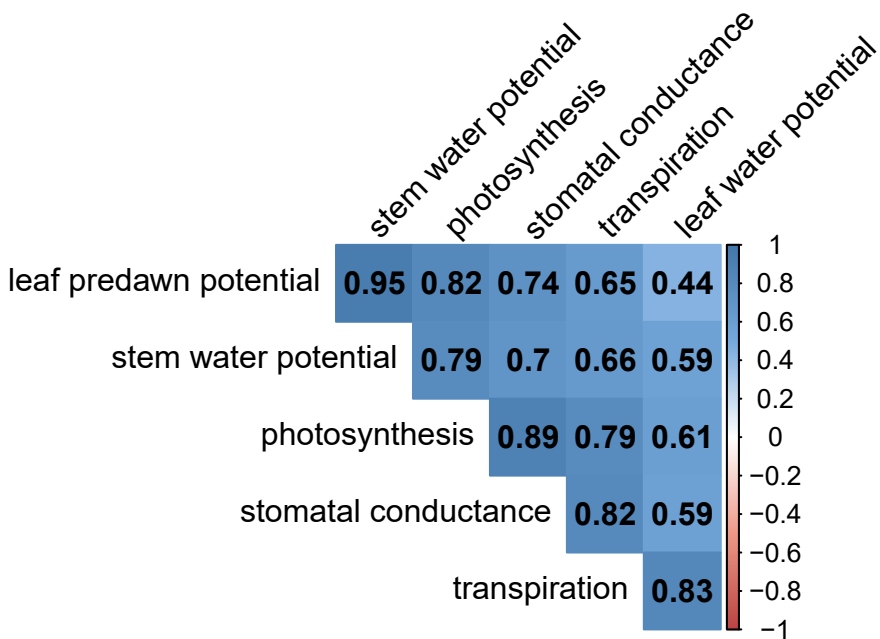

Figure S1. Correlations between the measured hydraulic parameters. Numbers represent Pearson's  $r$  ( $p < 0.001$ )

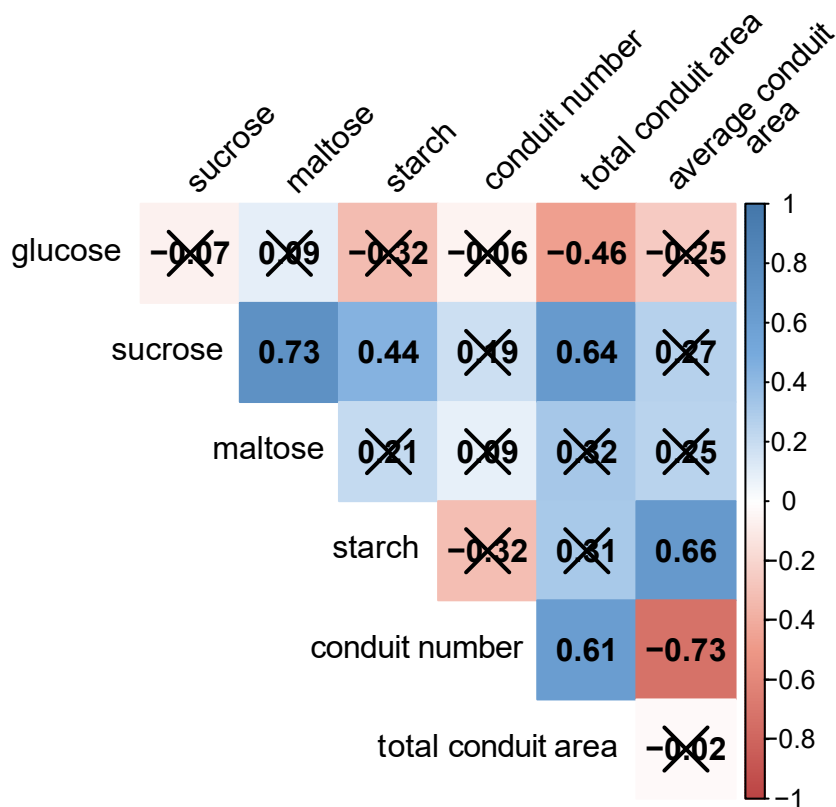

Figure S2. Correlations between the concentration of non-structural carbohydrates and xylem conduit measurements. In blue, positive correlations; red, negative correlations. Numbers represent Pearson's  $r$ , not significant correlations are also marked with a cross symbol ( $p < 0.05$ )
